# Supplementary material for: Connecting single-ion magnets through ligand dimerisation
Source: Royal Society of Chemistry journal article supplement (doi:10.1039/c2dt31226c), 2012-01-01
Supplement: c2dt31226c.pdf [file c2dt31226c.pdf]

## Supplementary Information

### Connecting single-ion magnets through ligand dimerisation

Po-Heng Lin,<sup>a</sup> Ilia Korobkov,<sup>a</sup> Tara J. Burchell,<sup>a</sup> Muralee Murugesu<sup>a,\*</sup>

Received (in XXX, XXX) Xth XXXXXXXXXX 20XX, Accepted Xth XXXXXXXXXX 2012

DOI: 10.1039/b000000x

<sup>a</sup> Department of Chemistry, University of Ottawa, 10 Marie Curie, Ottawa, ON, K1N 6N5, Canada.

m.murugesu@uottawa.ca

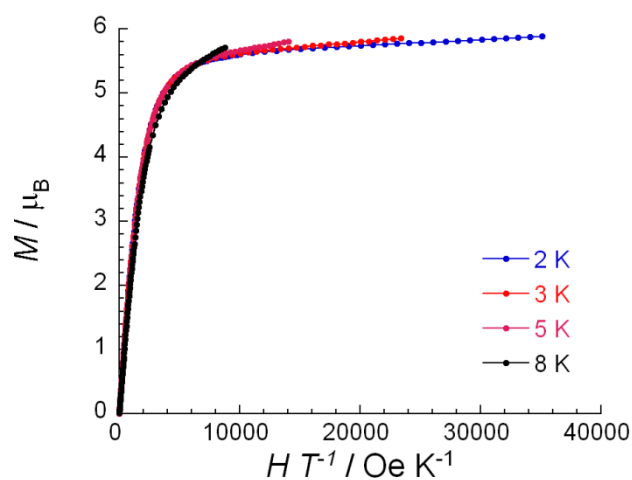

Figure S1.  $M$  vs.  $H/T$  plot measured between 2 K and 8 K for **1**
